# Supplementary material for: Characterization and Vaccine Potential of Membrane Vesicles Produced by Francisella noatunensis subsp. orientalis in an Adult Zebrafish Model
Source: PubMed Central journal article supplement (PMC5424235; doi:10.1128/cvi.00557-16), 2017-05-05
Supplement: CVI.00557-16_zcd999095474s1.pdf [file CVI.00557-16_zcd999095474s1.pdf]

# Figure 1S

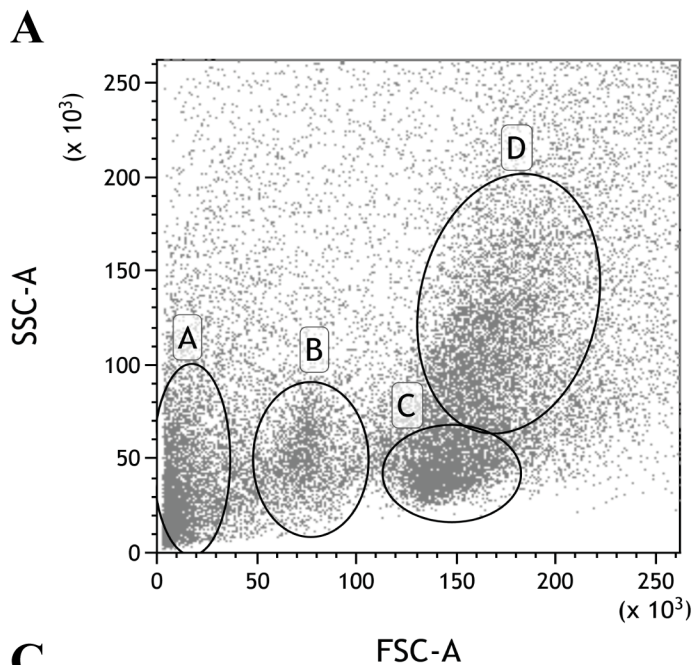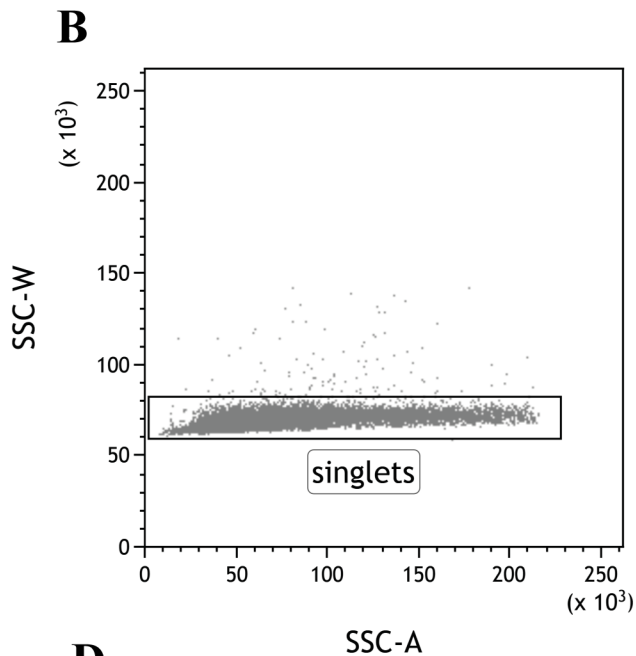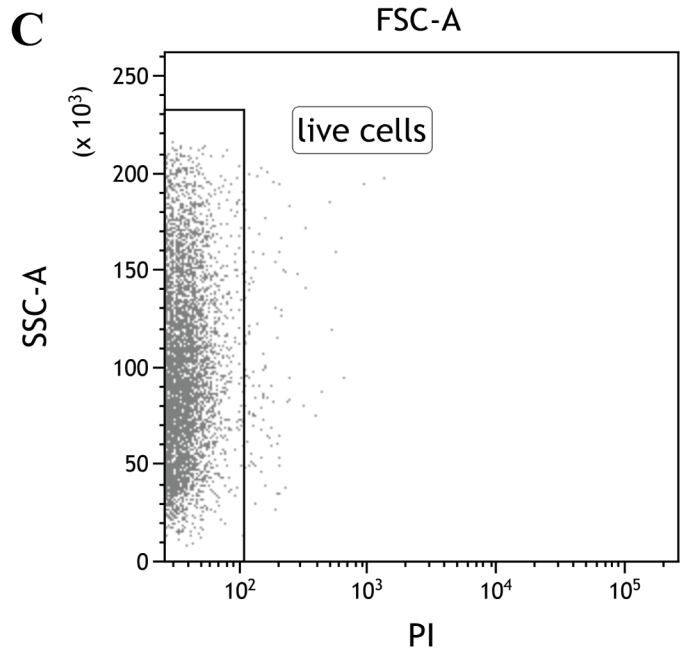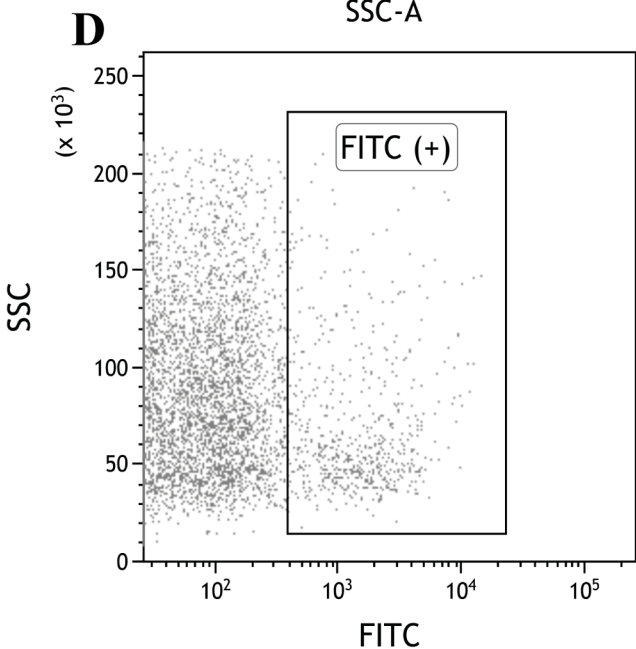

**Figure 1S.** Gating strategy of the major cell lineages from kidney by light-scatter characteristics. **A.** The different gates shown the different cell subset using forward scatter (FSC) and side scatter (SSC). A: mature erythrocytes, B: lymphocytes, C: precursors, D: mielomonocyt cells. **B.** Discrimination of aggregates from singlets using SSC-W versus SSC. **C.** Cell viability using propidium iodide. **D.** Cells able to incorporate Fno-FITC. Representative experiement of three idenpendent experiments.

# Figure 2S

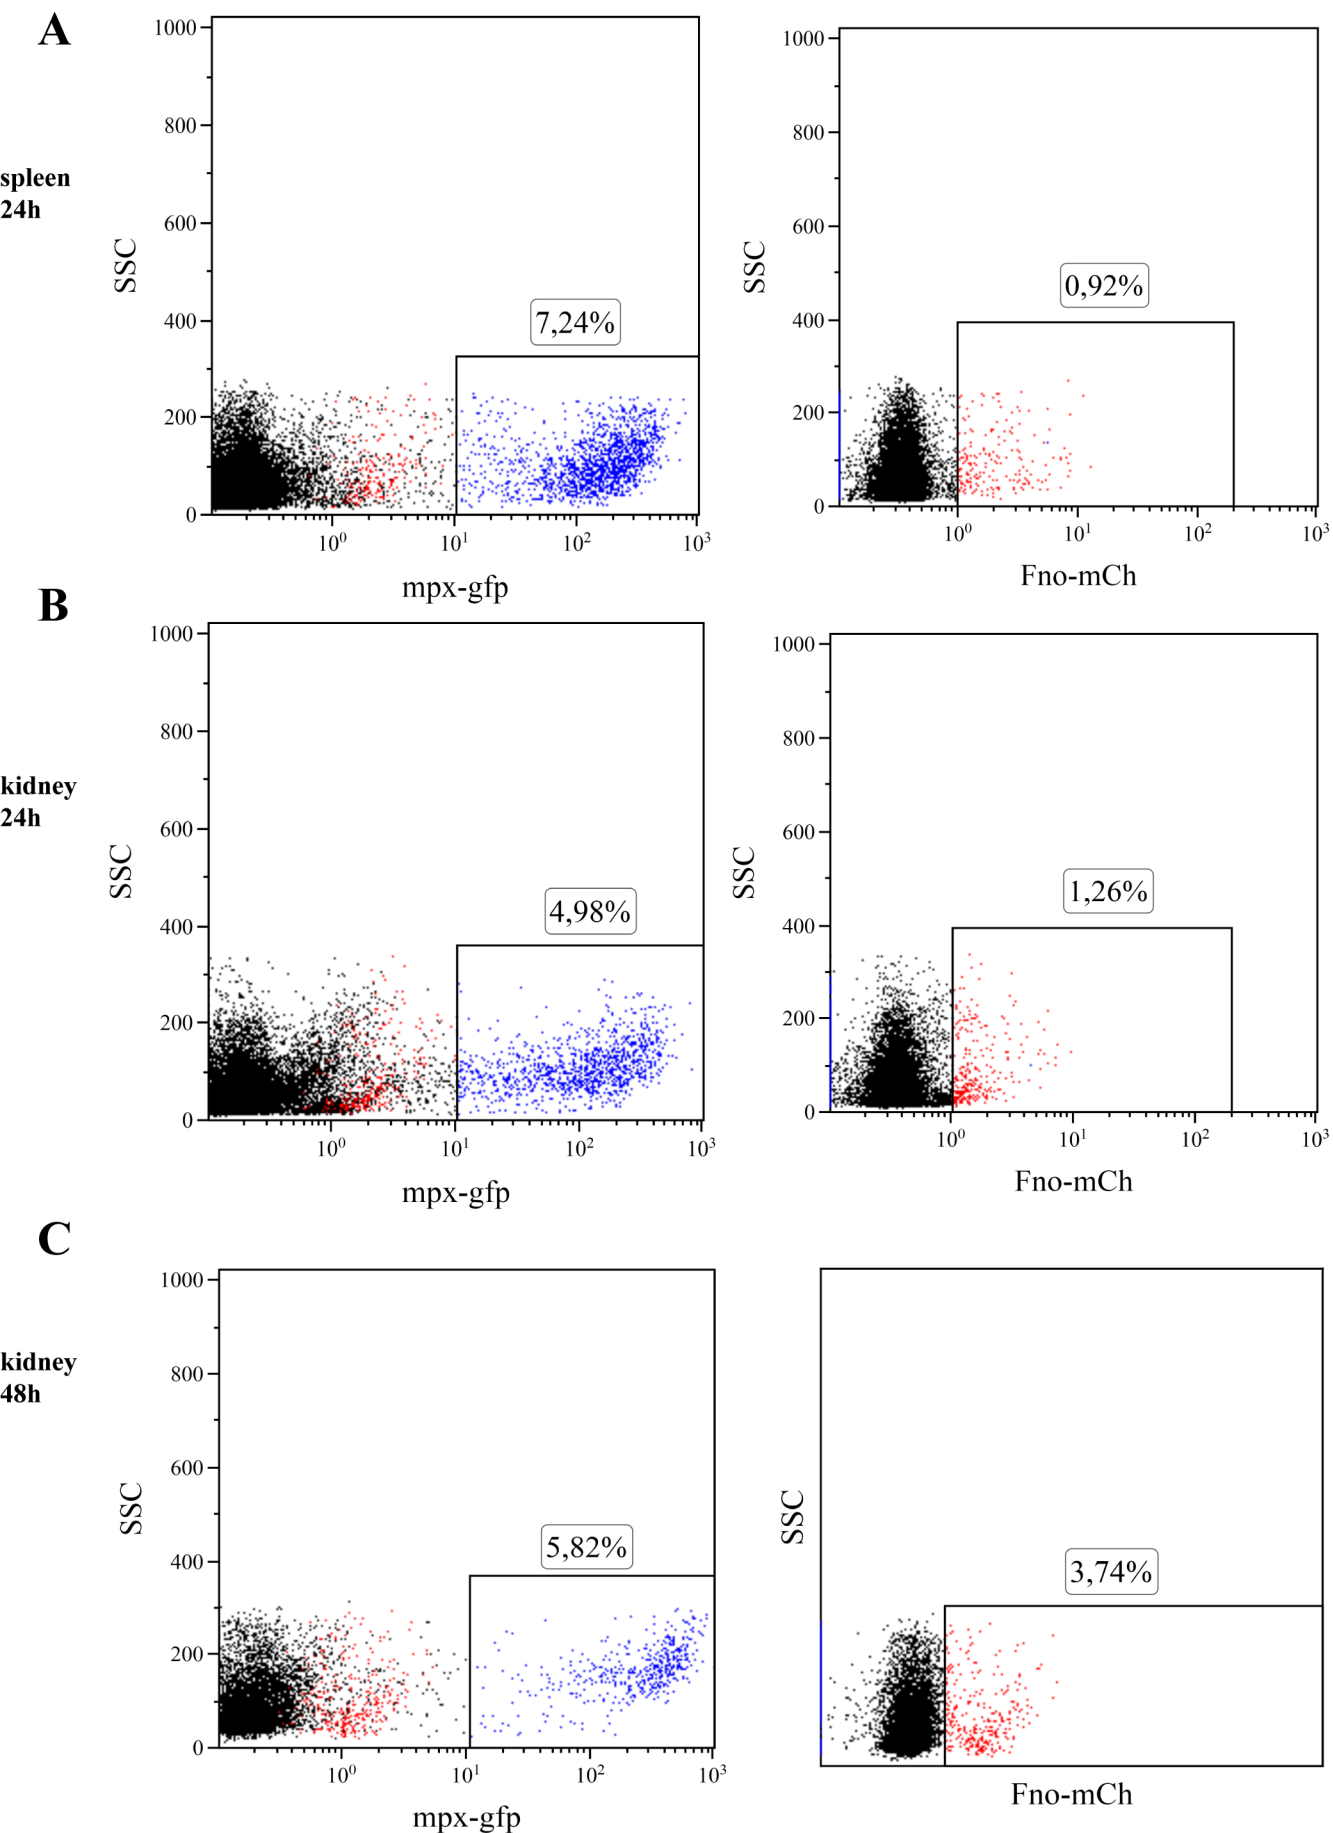

**Figure 2S.** Incorporation of *Fno*-mCherry *in vivo* analyzed by flow cytometry. Transgenic adult zebrafish *mpx-gfp* were challenge with *Fno*-mCherry and the incorporation of *Fno* was analyzed at different time points. Spleen (A) and kidney (B) were isolated at 24 h or 48 h (C) after injection and analyzed by flow cytometry. Dot-plot show the percentage of neutrophil (*mpx-gfp*) (left column) and the percentage of cells able to incorporate *Fno*-mCherry (right column). The data are based on representative experiment of three replicates.

## Figure 3S.

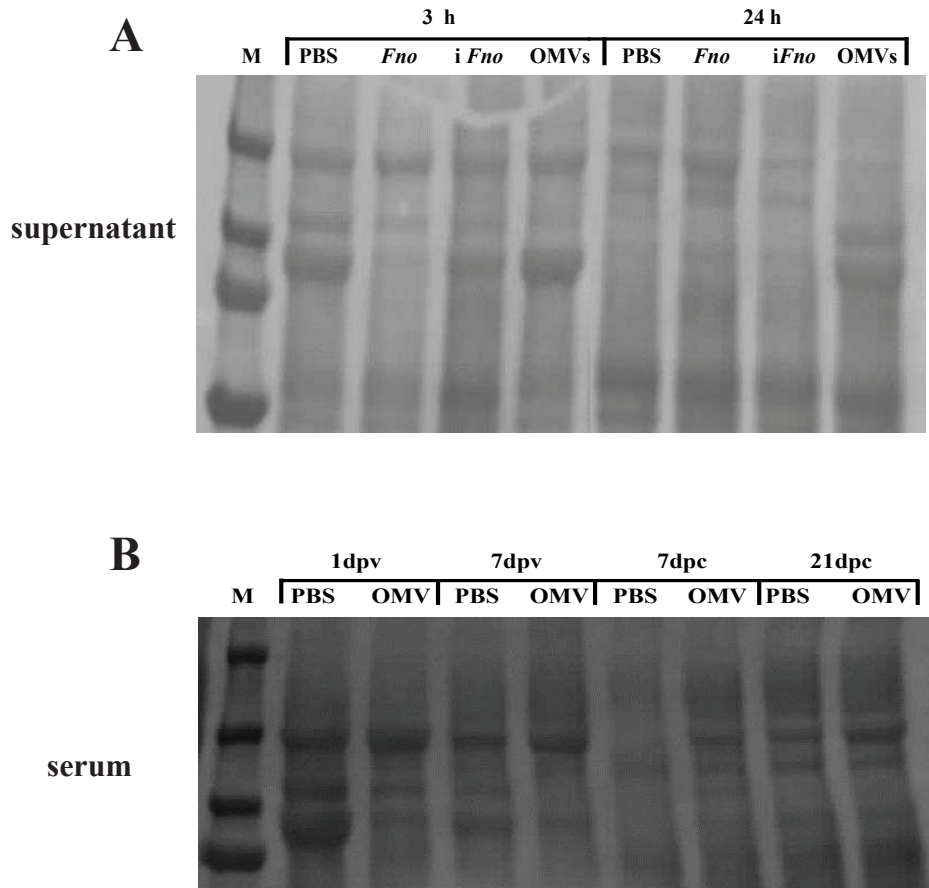

**Figure 3S.** Representative Western blot membrane showing protein content. **A.** Ponceau staining of supernatant protein after transfer to a membrane. Primary Zebrafish kidney cells cultivated *in vitro* for 3 h and 24 h in presence of PBS, *Fno* ( $1 \times 10^8$  CFU/ml), *Fno* inactivated in formalin (*iFno*) ( $1 \times 10^8$  CFU/ml) or MVs (20 $\mu$ g). **B.** Ponceau staining of serum protein of zebrafish injected with PBS or 20  $\mu$ g MVs at 1 or 7 day post vaccination (dpv); 7 or 21 days post challenge (dpc) with *Fno* ( $1 \times 10^6$  CFU) after transfer to a membrane. M: marker in kilo Daltons (kDa). The same amount of protein was load in each lane as measured by nanodrop, but different protein bands were observed between the different treatment and time point.

**Table 1S.** Primers used in qRT-PCR analysis

| Gene                              | Sequence 5' - 3' |                        | Amplicon | Access number | Gene ID   | Gen Name<br>ZFIN  |
|-----------------------------------|------------------|------------------------|----------|---------------|-----------|-------------------|
| <i>18s</i>                        | F                | ACCACCCACAGAATCGAGAAA  | 98       | FJ915075.1    | 100037361 | <i>zgc:158463</i> |
|                                   | R                | GCCTGCGGCTTAATTTGACT   |          |               |           |                   |
| <i>ef1a</i>                       | F                | CTTCTCAGGCTGACTGTGC    | 142      | FJ915061.1    | 30516     | <i>ef1a111</i>    |
|                                   | R                | CCGCTAGCATTACCCTCC     |          |               |           |                   |
| <i>il-1<math>\beta</math></i>     | F                | TTCCCCAAGTGCTGCTTATT   | 149      | NM_212844.2   | 405770    | <i>il1b</i>       |
|                                   | R                | AAGTTAAAACCGCTGTGGTCA  |          |               |           |                   |
| <i>mpx</i>                        | F                | TGATGTTTGGTTAGGAGGTG   | 101      | BC068379.1    | 337514    | <i>mpx</i>        |
|                                   | R                | GAGCTGTTTTCTGTTTGGTG   |          |               |           |                   |
| <i>mpeg</i>                       | F                | TACAGCACGGTTCAAGTCCGT  | 187      | NM_212737     | 335407    | <i>mpeg1.1</i>    |
|                                   | R                | ACTTGTGATGACATGGGTGCCG |          |               |           |                   |
| <i>mhci1</i>                      | F                | TGACTCAACTGTCCGTGATA   | 195      | BC083466.1    | 449770    | <i>zgc:103700</i> |
|                                   | R                | CCATTAGCCATCTCCATAGTG  |          |               |           |                   |
| <i>igm</i>                        | F                | GAAGCCTCCAATTCTGTTGG   | 147      | AY643751      | 378762    | <i>ighm</i>       |
|                                   | R                | CCGGGTAAACACATGAAG     |          |               |           |                   |
| <i>tnf-a1</i>                     | F                | GGTCTCTGTTGCGGAGGCG    | 108      | NM_212859     | 405785    | <i>tnfa</i>       |
|                                   | R                | CGAGCTGGAAGTCGCCCTGAG  |          |               |           |                   |
| <i>tnf-a2</i>                     | F                | GAGCAAATCCGTTATTCTCG   | 95       | NM_001024447  | 554167    | <i>tnfb</i>       |
|                                   | R                | GAGGGTGATGTCTGATAGAAC  |          |               |           |                   |
| <i>igd</i>                        | F                | GACACATTAGCCCATCAGCA   | 156      | BX510335      | 101883016 | <i>ighd</i>       |
|                                   | R                | CTGGAGAGCAGCAAAAGGAT   |          |               |           |                   |
| <i>igz/t</i>                      | F                | GAACCAAACCTCAGGGTTGGA  | 152      | AY643750      | 446139    | <i>ighz</i>       |
|                                   | R                | CACCCAGCATTCTACAGCAA   |          |               |           |                   |
| <i>il-12p35</i>                   | QT02085300       |                        | QUIAGEN  | NM_001007107  | 445410    | <i>il12a</i>      |
| <i>ifn-<math>\gamma</math>1-1</i> | QT02151961       |                        | QUIAGEN  | NM_001020793  | 553965    | <i>ifng1-1</i>    |
| <i>ifn-<math>\gamma</math>1-2</i> | QT02064328       |                        | QUIAGEN  | NM_212864     | 405790    | <i>ifng1-2</i>    |
| <i>ifnphi1</i>                    | QT02223109       |                        | QUIAGEN  | NM_207640     | 360134    | <i>ifnphi1</i>    |
| <i>ifnphi2</i>                    | QT02183839       |                        | QUIAGEN  | NM_001111082  | 100126802 | <i>ifnphi2</i>    |
| <i>ifnphi3(1)</i>                 | QT02139256       |                        | QUIAGEN  | NM_001111083  | 100126803 | <i>ifnphi3</i>    |
| <i>ifnphi3(2)</i>                 | QT02139263       |                        | QUIAGEN  | NM_001111083  | 100126803 | <i>ifnphi3</i>    |
| <i>mx-a</i>                       | QT02179205       |                        | QUIAGEN  | NM_182942     | 360142    | <i>mx-a</i>       |

**Table 2S.****Proteins Identified in OMVs from *Francisella noatunensis* subsp. *orientalis***

| <b>Protein</b>                                             | <b>Peptide hits</b> | <b>Protein product</b> | <b>Gene locus</b> | <b>Predicted subcellular location</b> |
|------------------------------------------------------------|---------------------|------------------------|-------------------|---------------------------------------|
| Bifunctional proline dehydrogenase/pyrroline-5-carboxylate | 158                 | WP_014715611.1         | OOM_1728          | Cytoplasmic                           |
| Intracellular growth locus, subunit C                      | 101                 | WP_014714932.1         | OOM_0933          | Unknown                               |
| 60kDa chaperonin GroEL                                     | 92                  | WP_014714726.1         | OOM_0688          | Cytoplasmic                           |
| ATP synthase subunit b                                     | 91                  | WP_004286980.1         | OOM_0555          | CytoplasmicMembrane                   |
| ATP synthase subunit alpha                                 | 89                  | WP_014714619.1         | OOM_0557          | Cytoplasmic                           |
| Outer membrane associated protein                          | 88                  | WP_014715233.1         | OOM_1284          | OuterMembrane                         |
| Catalase-peroxidase                                        | 81                  | WP_014715162.1         | OOM_1206          | Unknown/ multiple localization        |
| OmpA family protein                                        | 76                  | WP_014714420.1         | OOM_0329          | OuterMembrane                         |
| Succinate dehydrogenase iron-sulfur subunit                | 75                  | WP_014714631.1         | OOM_0570          | CytoplasmicMembrane                   |
| Intracellular growth locus protein B                       | 73                  | WP_014714931.1         | OOM_0932          | Cytoplasmic                           |
| Putative uncharacterized protein                           | 63                  | WP_014714929.1         | OOM_0930          | OuterMembrane                         |
| Ribonuclease E                                             | 59                  | WP_014715484.1         | OOM_1576          | Cytoplasmic                           |
| Pyruvate dehydrogenase E1 component                        | 58                  | WP_014714759.1         | OOM_0731          | Cytoplasmic                           |
| Serine-type D-Ala-D-Ala carboxypeptidase                   | 56                  | WP_014714959.1         | OOM_0962          | Unknown/ multiple localization        |
| Chaperone ClpB                                             | 53                  | WP_014715663.1         | OOM_1793          | Cytoplasmic                           |
| Glycerol-3-phosphate dehydrogenase                         | 51                  | WP_014714672.1         | OOM_0621          | Unknown/ multiple localization        |
| Enolase                                                    | 51                  | WP_014715152.1         | OOM_1196          | Cytoplasmic                           |
| Succinate dehydrogenase                                    | 48                  | WP_014714630.1         | OOM_0569          | CytoplasmicMembrane                   |
| Peptidyl-prolyl cis-trans isomerase                        | 46                  | WP_014715675.1         | OOM_1806          | OuterMembrane                         |
| ATP synthase gamma chain                                   | 45                  | WP_014714620.1         | OOM_0558          | Cytoplasmic                           |
| HflK-HflC membrane protein complex, HflK                   | 43                  | WP_014715271.1         | OOM_1329          | Cytoplasmic                           |
| tRNA adenylyltransferase                                   | 43                  | WP_014714748.1         | OOM_0718          | Cytoplasmic                           |
| Chaperone protein DnaK                                     | 42                  | WP_014714552.1         | OOM_0476          | Cytoplasmic                           |
| Polyribonucleotide nucleotidyltransferase                  | 41                  | WP_014715145.1         | OOM_1186          | Cytoplasmic                           |
| microtubule-severing ATPase                                | 41                  | WP_014715206.1         | OOM_1255          | CytoplasmicMembrane                   |
| dTDP-4-dehydrorhamnose 3,5-epimerase                       | 40                  | WP_014714804.1         | OOM_0799          | Unknown                               |
| MMS1, Mono-functional DNA-alkylating agent methyl          | 39                  | WP_014714941.1         | OOM_0943          | Unknown/ multiple localization        |
| septum formation inhibitor-activating ATPase               | 38                  | WP_014714409.1         | OOM_0313          | Cytoplasmic                           |
| Cell division protein FtsZ                                 | 38                  | WP_014714255.1         | OOM_0142          | Cytoplasmic                           |
| Putative uncharacterized protein                           | 36                  | WP_014715133.1         | OOM_1173          | CytoplasmicMembrane                   |
| Putative uncharacterized protein                           | 36                  | WP_014714436.1         | OOM_0347          | Unknown                               |

**Table 2S.**

|                                                                |    |                |          |                                |
|----------------------------------------------------------------|----|----------------|----------|--------------------------------|
| 50S ribosomal protein L2                                       | 35 | WP_014714331.1 | OOM_0224 | Cytoplasmic                    |
| LemA-like protein                                              | 35 | WP_014714465.1 | OOM_0377 | Cytoplasmic                    |
| Peptidyl-prolyl cis-trans isomerase                            | 33 | WP_014714970.1 | OOM_0973 | OuterMembrane                  |
| Protein TolB                                                   | 32 | WP_014714429.1 | OOM_0338 | Periplasmic                    |
| 30S ribosomal protein S1                                       | 32 | WP_014714250.1 | OOM_0137 | Cytoplasmic                    |
| dihydrolipoamide acetyltransferase                             | 32 | WP_014714760.1 | OOM_0732 | Cytoplasmic                    |
| Succinyl-CoA ligase [ADP-forming] subunit beta                 | 31 | WP_014715132.1 | OOM_1172 | Cytoplasmic                    |
| Cell entry related family protein                              | 31 | WP_014714564.1 | OOM_0490 | Unknown                        |
| 30S ribosomal protein S5                                       | 31 | WP_014714344.1 | OOM_0238 | Cytoplasmic                    |
| 2-oxoglutarate dehydrogenase complex, E2 component             | 31 | WP_014714633.1 | OOM_0572 | Cytoplasmic                    |
| Putative uncharacterized protein                               | 31 | WP_014714497.1 | OOM_0414 | Unknown                        |
| ATP synthase subunit beta                                      | 30 | WP_014714621.1 | OOM_0559 | Cytoplasmic                    |
| Elongation factor Tu                                           | 30 | WP_014714676.1 | OOM_0626 | Cytoplasmic                    |
| Elongation factor G                                            | 30 | WP_014714327.1 | OOM_0219 | Cytoplasmic                    |
| DsbA_Com1_like, DsbA family, Com1-like subfamily               | 30 | WP_014714996.1 | OOM_1001 | Unknown                        |
| Succinyl-CoA ligase [ADP-forming] subunit alpha                | 30 | WP_014715131.1 | OOM_1171 | Cytoplasmic                    |
| 50S ribosomal protein L21                                      | 30 | WP_014715213.1 | OOM_1262 | Cytoplasmic                    |
| Putative uncharacterized protein                               | 29 | WP_014714940.1 | OOM_0942 | Unknown                        |
| Membrane fusion protein                                        | 29 | WP_014714557.1 | OOM_0482 | Unknown/ multiple localization |
| Cytochrome d ubiquinol oxidase subunit I                       | 29 | WP_014714285.1 | OOM_0172 | CytoplasmicMembrane            |
| Membrane fusion protein                                        | 28 | WP_014714655.1 | OOM_0599 | CytoplasmicMembrane            |
| ATP-dependent protease ATP-binding subunit                     | 27 | WP_014715311.1 | OOM_1378 | Cytoplasmic                    |
| VacJ like lipoprotein                                          | 27 | WP_014714402.1 | OOM_0305 | OuterMembrane                  |
| Glutamate dehydrogenase                                        | 27 | WP_014714731.1 | OOM_0696 | Unknown/ multiple localization |
| OmpA family peptidoglycan-associated lipoprotein               | 25 | WP_014714431.1 | OOM_0340 | OuterMembrane                  |
| RmuC family protein                                            | 24 | WP_014715293.1 | OOM_1356 | Cytoplasmic                    |
| Putative uncharacterized protein                               | 24 | WP_014714891.1 | OOM_0882 | Unknown                        |
| Peptidyl-prolyl cis-trans isomerase SurA                       | 24 | WP_014715101.1 | OOM_1137 | Periplasmic                    |
| Protein-export membrane protein SecF                           | 24 | WP_014715251.1 | OOM_1307 | CytoplasmicMembrane            |
| NADH dehydrogenase (Quinone)                                   | 24 | WP_014714596.1 | OOM_0531 | Cytoplasmic                    |
| Putative uncharacterized protein                               | 24 | WP_014715252.1 | OOM_1308 | Unknown                        |
| Acetyl-CoA carboxylase, biotin carboxy carrier protein subunit | 24 | WP_014715105.1 | OOM_1141 | Unknown                        |
| Glycerol-3-phosphate acyltransferase                           | 23 | WP_014715244.1 | OOM_1297 | CytoplasmicMembrane            |
| Putative uncharacterized protein                               | 23 | WP_014714184.1 | OOM_0066 | Cytoplasmic                    |

**Table 2S.**

|                                                              |    |                |          |                                |
|--------------------------------------------------------------|----|----------------|----------|--------------------------------|
| GDP-mannose 4,6-dehydratase                                  | 21 | WP_014714812.1 | OOM_0777 | Cytoplasmic                    |
| Toluene tolerance                                            | 21 | WP_014714405.1 | OOM_0308 | Unknown                        |
| Heat shock protein HtpG                                      | 21 | WP_014714354.1 | OOM_0249 | Cytoplasmic                    |
| Putative uncharacterized protein                             | 21 | WP_014714496.1 | OOM_0413 | OuterMembrane                  |
| NADH-quinone oxidoreductase subunit C                        | 21 | WP_014714594.1 | OOM_0529 | Cytoplasmic                    |
| Putative cyanophycin synthetase                              | 20 | WP_014715239.1 | OOM_1291 | Cytoplasmic                    |
| DNA-directed RNA polymerase subunit beta                     | 20 | WP_014714682.1 | OOM_0633 | Cytoplasmic                    |
| Cell division protein                                        | 20 | WP_014714384.1 | OOM_0280 | CytoplasmicMembrane            |
| Putative uncharacterized protein                             | 20 | WP_014714203.1 | OOM_0085 | Unknown/ multiple localization |
| Ubiquinone/menaquinone biosynthesis C-methyltransferase UbiE | 20 | WP_014714522.1 | OOM_0442 | Cytoplasmic                    |
| Lipid A export ATP-binding/permease protein MsbA             | 20 | WP_014714657.1 | OOM_0602 | CytoplasmicMembrane            |
| 50S ribosomal protein L9                                     | 20 | WP_014714979.1 | OOM_0983 | Cytoplasmic                    |
| Phosphatidylserine decarboxylase proenzyme                   | 20 | WP_014715025.1 | OOM_1043 | CytoplasmicMembrane            |
| Putative uncharacterized protein                             | 20 | WP_014714412.1 | OOM_0317 | Unknown                        |
| NADH dehydrogenase                                           | 20 | WP_014715682.1 | OOM_1816 | Cytoplasmic                    |
| Protein translocase subunit SecD                             | 19 | WP_014715250.1 | OOM_1306 | CytoplasmicMembrane            |
| AMP-binding protein                                          | 19 | WP_014715140.1 | OOM_1181 | CytoplasmicMembrane            |
| Putative glutamate synthase                                  | 19 | WP_014714897.1 | OOM_0890 | Cytoplasmic                    |
| Putative lipoprotein                                         | 19 | WP_014714379.1 | OOM_0274 | Unknown                        |
| Peptide methionine sulfoxide reductase MsrA                  | 19 | WP_014715695.1 | OOM_1832 | Unknown                        |
| 50S ribosomal protein L17                                    | 19 | WP_014714352.1 | OOM_0247 | Cytoplasmic                    |
| Putative uncharacterized protein                             | 18 | WP_014714796.1 | OOM_0779 | OuterMembrane                  |
| Alpha-ketoglutarate decarboxylase                            | 18 | WP_014714632.1 | OOM_0571 | Cytoplasmic                    |
| 30S ribosomal protein S11                                    | 18 | WP_003021583.1 | OOM_0244 | Cytoplasmic                    |
| Pyridoxal biosynthesis lyase PdxS                            | 18 | WP_014715137.1 | OOM_1178 | Cytoplasmic                    |
| Lipoprotein                                                  | 18 | WP_014715467.1 | OOM_1553 | Unknown                        |
| DNA-binding protein HU-beta                                  | 18 | WP_014715264.1 | OOM_1322 | Cytoplasmic                    |
| NADH dehydrogenase subunit G                                 | 17 | WP_014714597.1 | OOM_0532 | Cytoplasmic                    |
| tRNA nucleotidyltransferase                                  | 17 | WP_014714461.1 | OOM_0373 | Cytoplasmic                    |
| Putative uncharacterized protein                             | 17 | WP_014714563.1 | OOM_0489 | Unknown                        |
| Putative uncharacterized protein                             | 17 | WP_014715220.1 | OOM_1271 | Cytoplasmic                    |
| ATP synthase epsilon chain                                   | 17 | WP_014714622.1 | OOM_0560 | Unknown/ multiple localization |
| Cell wall biosynthesis glycosyltransferase-like protein      | 17 | WP_014714838.1 | OOM_0822 | Cytoplasmic                    |

**Table 2S.**

|                                                                |    |                |          |                                |
|----------------------------------------------------------------|----|----------------|----------|--------------------------------|
| Soluble lytic murein transglycosylase                          | 16 | WP_014715037.1 | OOM_1057 | Periplasmic                    |
| NADH-quinone oxidoreductase subunit I                          | 16 | WP_012280348.1 | OOM_0534 | Cytoplasmic                    |
| Glycerophosphoryl diester phosphodiesterase                    | 16 | WP_014715164.1 | OOM_1209 | Periplasmic                    |
| Protein HflC                                                   | 16 | WP_014715272.1 | OOM_1330 | Cytoplasmic                    |
| 50S ribosomal protein L7/L12                                   | 16 | WP_014714681.1 | OOM_0632 | Unknown/ multiple localization |
| pyruvate dehydrogenase complex, E3 component, dihydrolipoamide | 16 | WP_014714761.1 | OOM_0733 | Cytoplasmic                    |
| 30S ribosomal protein S3                                       | 16 | WP_014714334.1 | OOM_0227 | Cytoplasmic                    |
| 30S ribosomal protein S7                                       | 16 | WP_014714326.1 | OOM_0218 | Cytoplasmic                    |
| Phosphopentomutase                                             | 16 | WP_014714661.1 | OOM_0606 | Cytoplasmic                    |
| ATP synthase subunit C                                         | 16 | WP_014714617.1 | OOM_0554 | CytoplasmicMembrane            |
| Protein-L-isoaspartate O-methyltransferase                     | 15 | WP_014714573.1 | OOM_0501 | Cytoplasmic                    |
| exoribonuclease II                                             | 15 | WP_014714788.1 | OOM_0764 | Cytoplasmic                    |
| Elongation factor Ts                                           | 15 | WP_014714319.1 | OOM_0210 | Cytoplasmic                    |
| ATP-binding cassette (ABC) superfamily protein                 | 15 | WP_014714869.1 | OOM_0854 | CytoplasmicMembrane            |
| 50S ribosomal protein L16                                      | 15 | WP_014714335.1 | OOM_0228 | Cytoplasmic                    |
| Acyltransferase                                                | 15 | WP_014715669.1 | OOM_1800 | CytoplasmicMembrane            |
| Putative uncharacterized protein                               | 15 | WP_014715657.1 | OOM_1786 | Unknown                        |
| 2-nonaprenyl-3-methyl-6-methoxy-1,4-benzoquinol hydroxylase    | 15 | WP_014715635.1 | OOM_1757 | Cytoplasmic                    |
| Glyceraldehyde-3-phosphate dehydrogenase (Phosphorylating)     | 14 | WP_014714923.1 | OOM_0922 | Cytoplasmic                    |
| Membrane protein                                               | 14 | WP_014715198.1 | OOM_1246 | CytoplasmicMembrane            |
| Heat shock protein HtpX                                        | 14 | WP_014714464.1 | OOM_0376 | CytoplasmicMembrane            |
| Glycosyl transferase group 1 family protein                    | 14 | WP_014715478.1 | OOM_1569 | Cytoplasmic                    |
| Two-component regulator, sensor histidine kinase               | 14 | WP_014714646.1 | OOM_0590 | CytoplasmicMembrane            |
| ABC transporter, ATP-binding protein                           | 14 | WP_014714236.1 | OOM_0120 | CytoplasmicMembrane            |
| Putative uncharacterized protein                               | 14 | WP_014714498.1 | OOM_0416 | OuterMembrane                  |
| 30S ribosomal protein S12                                      | 14 | WP_003035357.1 | OOM_0217 | Cytoplasmic                    |
| Cell division topological specificity factor                   | 14 | WP_012279974.1 | OOM_0312 | Cytoplasmic                    |
| Co/Zn/Cd cation transporter                                    | 14 | WP_014715336.1 | OOM_1404 | CytoplasmicMembrane            |
| 30S ribosomal protein S6                                       | 14 | WP_013923199.1 | OOM_0985 | Cytoplasmic                    |
| malate dehydrogenase                                           | 13 | WP_014715200.1 | OOM_1248 | Cytoplasmic                    |
| Serine hydroxymethyltransferase                                | 13 | WP_014715473.1 | OOM_1564 | Cytoplasmic                    |
| Serine-type D-Ala-D-Ala carboxypeptidase                       | 13 | WP_014714967.1 | OOM_0970 | Unknown/ multiple localization |



**Table 2S.**

|                                                    |    |                |          |                     |
|----------------------------------------------------|----|----------------|----------|---------------------|
| Cell division protein ftsA                         | 13 | WP_014714254.1 | OOM_0141 | Cytoplasmic         |
| Fructose-1,6-bisphosphate aldolase                 | 13 | WP_014714925.1 | OOM_0925 | Cytoplasmic         |
| 30S ribosomal protein S2                           | 13 | WP_014714318.1 | OOM_0209 | Cytoplasmic         |
| Preprotein translocase family protein              | 13 | WP_014715249.1 | OOM_1305 | CytoplasmicMembrane |
| Heavy metal cation transport ATPase                | 13 | WP_014714468.1 | OOM_0380 | CytoplasmicMembrane |
| 2', 3'-cyclic nucleotide 2'-phosphodiesterase      | 13 | WP_014715225.1 | OOM_1276 | Periplasmic         |
| Translation initiation factor IF-2                 | 12 | WP_014714608.1 | OOM_0545 | Cytoplasmic         |
| enoyl-ACP reductase I                              | 12 | WP_014715506.1 | OOM_1600 | CytoplasmicMembrane |
| DNA-directed RNA polymerase subunit beta           | 12 | WP_014714683.1 | OOM_0634 | Cytoplasmic         |
| 30S ribosomal protein S10                          | 12 | WP_004286618.1 | OOM_0220 | Cytoplasmic         |
| 50S ribosomal protein L1                           | 12 | WP_014714679.1 | OOM_0630 | Cytoplasmic         |
| Acyl carrier protein                               | 12 | WP_004287370.1 | OOM_0914 | Cytoplasmic         |
| 2-alkenal reductase                                | 12 | WP_014715581.1 | OOM_1695 | CytoplasmicMembrane |
| Ferrochelatase                                     | 12 | WP_014715615.1 | OOM_1735 | Cytoplasmic         |
| Peptidase                                          | 12 | WP_014715529.1 | OOM_1628 | CytoplasmicMembrane |
| Phosphorylase                                      | 11 | WP_014715058.1 | OOM_1084 | Cytoplasmic         |
| 50S ribosomal protein L10                          | 11 | WP_014714680.1 | OOM_0631 | Cytoplasmic         |
| Chaperone protein DnaJ                             | 11 | WP_014714553.1 | OOM_0477 | Cytoplasmic         |
| 50S ribosomal protein L20                          | 11 | WP_014715541.1 | OOM_1643 | Cytoplasmic         |
| Single-stranded DNA-binding protein                | 11 | WP_014714219.1 | OOM_0102 | Cytoplasmic         |
| beta-hydroxyacyl-ACP dehydratase                   | 11 | WP_014714772.1 | OOM_0745 | Cytoplasmic         |
| Acyltransferase family                             | 11 | WP_014714808.1 | OOM_0808 | Cytoplasmic         |
| septum formation inhibitor                         | 11 | WP_014714410.1 | OOM_0314 | Cytoplasmic         |
| ABC transporter, ATP-binding protein               | 11 | WP_014714954.1 | OOM_0957 | Cytoplasmic         |
| Putative uncharacterized protein                   | 11 | WP_014715280.1 | OOM_1342 | CytoplasmicMembrane |
| Ferric iron binding protein, ferritin-like protein | 11 | WP_014715286.1 | OOM_1349 | Cytoplasmic         |
| Protein translocase subunit SecY                   | 11 | WP_014714347.1 | OOM_0241 | CytoplasmicMembrane |
| Putative uncharacterized protein                   | 11 | WP_014714382.1 | OOM_0278 | CytoplasmicMembrane |
| 50S ribosomal protein L3                           | 10 | WP_014714328.1 | OOM_0221 | Cytoplasmic         |
| competence lipoprotein ComL                        | 10 | WP_014714569.1 | OOM_0495 | OuterMembrane       |
| Phosphoenolpyruvate carboxylase                    | 10 | WP_014715088.1 | OOM_1118 | Cytoplasmic         |
| Biopolymer transport protein                       | 10 | WP_014714427.1 | OOM_0336 | CytoplasmicMembrane |
| 50S ribosomal protein L28                          | 10 | WP_004286518.1 | OOM_0316 | Cytoplasmic         |
| Major Facilitator Superfamily                      | 10 | WP_014714653.1 | OOM_0597 | CytoplasmicMembrane |

**Table 2S.**

|                                                              |    |                |          |                                |
|--------------------------------------------------------------|----|----------------|----------|--------------------------------|
| RgpF, Rhamnan synthesis protein F                            | 10 | WP_014714845.1 | OOM_0829 | Cytoplasmic                    |
| DEAD/DEAH box helicase                                       | 9  | WP_014715362.1 | OOM_1434 | Cytoplasmic                    |
| Dihydrolipoamide dehydrogenase                               | 9  | WP_014714734.1 | OOM_0702 | Cytoplasmic                    |
| Polyamine transporter, ABC transporter, ATP-binding protein  | 9  | WP_014715217.1 | OOM_1267 | CytoplasmicMembrane            |
| Acetyl-CoA carboxylase, biotin carboxylase subunit           | 9  | WP_014715106.1 | OOM_1142 | Cytoplasmic                    |
| ABC transporter ATPase                                       | 9  | WP_014715044.1 | OOM_1067 | CytoplasmicMembrane            |
| 50S ribosomal protein L5                                     | 9  | WP_014714340.1 | OOM_0233 | Cytoplasmic                    |
| Putative uncharacterized protein                             | 9  | WP_014715555.1 | OOM_1658 | Cytoplasmic                    |
| ABC transporter, ATP-binding protein                         | 9  | WP_014714408.1 | OOM_0311 | CytoplasmicMembrane            |
| Membrane protein insertase YidC                              | 9  | WP_014714168.1 | OOM_0048 | CytoplasmicMembrane            |
| Pseudouridine synthase                                       | 9  | WP_014714976.1 | OOM_0979 | Cytoplasmic                    |
| Intracellular growth locus protein D                         | 9  | WP_014714933.1 | OOM_0934 | Cytoplasmic                    |
| NADH dehydrogenase (Quinone)                                 | 9  | WP_014714602.1 | OOM_0538 | CytoplasmicMembrane            |
| 50S ribosomal protein L14                                    | 9  | WP_014714338.1 | OOM_0231 | Cytoplasmic                    |
| Putative uncharacterized protein                             | 9  | WP_014715165.1 | OOM_1210 | Unknown                        |
| leucyl aminopeptidase                                        | 9  | WP_014715199.1 | OOM_1247 | Cytoplasmic                    |
| Putative uncharacterized protein                             | 8  | WP_014714585.1 | OOM_0514 | Unknown                        |
| Cell division protein FtsI/penicillin-binding protein        | 8  | WP_014715143.1 | OOM_1184 | Unknown/ multiple localization |
| HlyD family membrane fusion protein                          | 8  | WP_014714151.1 | OOM_0023 | CytoplasmicMembrane            |
| Putative uncharacterized protein                             | 8  | WP_014714511.1 | OOM_0430 | Unknown/ multiple localization |
| Stearoyl-CoA 9-desaturase                                    | 8  | WP_014714685.1 | OOM_0637 | CytoplasmicMembrane            |
| O-antigen export system ATP-binding protein orfB             | 7  | WP_014714849.1 | OOM_0833 | CytoplasmicMembrane            |
| GTP-binding protein EngA                                     | 7  | WP_014714513.1 | OOM_0432 | CytoplasmicMembrane            |
| 50S ribosomal protein L11                                    | 7  | WP_012280431.1 | OOM_0629 | Cytoplasmic                    |
| ABC transporter                                              | 7  | WP_014715043.1 | OOM_1066 | CytoplasmicMembrane            |
| Lysophospholipase_L1_like, Lysophospholipase L1-like protein | 7  | WP_014714949.1 | OOM_0951 | Periplasmic                    |
| host factor I for bacteriophage Q beta replication           | 7  | WP_014715267.1 | OOM_1325 | Cytoplasmic                    |
| UDP-3-O-acylglucosamine N-acyltransferase                    | 7  | WP_014714771.1 | OOM_0744 | Cytoplasmic                    |
| aspartyl-tRNA synthetase                                     | 7  | WP_014714225.1 | OOM_0109 | Cytoplasmic                    |
| Putative lipoprotein                                         | 7  | WP_014714555.1 | OOM_0479 | Unknown                        |
| Sugar_tr, Sugar (And other) transporter                      | 7  | WP_014715361.1 | OOM_1431 | CytoplasmicMembrane            |
| M24 family peptidase                                         | 7  | WP_014715585.1 | OOM_1700 | Cytoplasmic                    |
| Signal peptidase I                                           | 7  | WP_014714786.1 | OOM_0761 | CytoplasmicMembrane            |
| Chromosomal replication initiator protein DnaA               | 7  | WP_014714132.1 | OOM_0001 | Cytoplasmic                    |

**Table 2S.**

|                                                                     |   |                |          |                                |
|---------------------------------------------------------------------|---|----------------|----------|--------------------------------|
| Sel1-like protein                                                   | 7 | WP_014714370.1 | OOM_0265 | Unknown                        |
| type IV pilus prepilin peptidase PilD                               | 7 | WP_014715308.1 | OOM_1374 | CytoplasmicMembrane            |
| Arsenate reductase                                                  | 7 | WP_014714800.1 | OOM_0789 | Cytoplasmic                    |
| Signal recognition particle receptor FtsY                           | 6 | WP_014714665.1 | OOM_0612 | Cytoplasmic                    |
| Carbonic anhydrase                                                  | 6 | WP_014715258.1 | OOM_1314 | Cytoplasmic                    |
| Ferrous iron transport protein B                                    | 6 | WP_014714724.1 | OOM_0684 | CytoplasmicMembrane            |
| Phosphoglucosamine mutase                                           | 6 | WP_014714635.1 | OOM_0574 | Cytoplasmic                    |
| ATP-dependent protease peptidase subunit                            | 6 | WP_014715312.1 | OOM_1379 | Cytoplasmic                    |
| Cysteine/glutathione ABC transporter membrane/ATP-binding component | 6 | WP_014715178.1 | OOM_1225 | CytoplasmicMembrane            |
| Pathogenicity determinant protein pdpA1                             | 6 | WP_014714942.1 | OOM_0944 | Unknown/ multiple localization |
| Glutathione synthetase                                              | 6 | WP_014715412.1 | OOM_1486 | Cytoplasmic                    |
| Membrane-bound lytic murein transglycosylase                        | 6 | WP_014714550.1 | OOM_0474 | Unknown/ multiple localization |
| Homoserine/threonine efflux family protein                          | 6 | WP_014714873.1 | OOM_0858 | CytoplasmicMembrane            |
| NADH-quinone oxidoreductase subunit A                               | 6 | WP_014714593.1 | OOM_0527 | CytoplasmicMembrane            |
| Putative uncharacterized protein                                    | 6 | WP_014715019.1 | OOM_1037 | Extracellular                  |
| Putative uncharacterized protein                                    | 6 | WP_014714364.1 | OOM_0259 | CytoplasmicMembrane            |
| Type IV pili, pilus assembly protein                                | 6 | WP_014714664.1 | OOM_0611 | Unknown                        |
| Glycosyl transferase family protein                                 | 6 | WP_014714851.1 | OOM_0835 | Unknown                        |
| Putative uncharacterized protein                                    | 6 | WP_014715026.1 | OOM_1044 | Unknown                        |
| 30S ribosomal protein S16                                           | 6 | WP_004287066.1 | OOM_0639 | Cytoplasmic                    |
| Glycosyltransferase                                                 | 6 | WP_014714711.1 | OOM_0670 | Unknown                        |
| Putative capsule biosynthesis protein                               | 6 | WP_014715532.1 | OOM_1631 | CytoplasmicMembrane            |
| Putative uncharacterized protein                                    | 6 | WP_014714937.1 | OOM_0938 | Unknown                        |
| Aminomethyltransferase                                              | 6 | WP_014715046.1 | OOM_1069 | Cytoplasmic                    |
| Transketolase                                                       | 6 | WP_014714935.1 | OOM_0936 | Cytoplasmic                    |
| ornithine cyclodeaminase                                            | 6 | WP_014714814.1 | OOM_0780 | Cytoplasmic                    |

**Table 3S.** Ct values from the RT-qPCR data presented in Figure 6.

|                   | 1dpv       |            | 7dpv       |            | 21dpv      |            | 1dpc       |            | 7dpc       |            |
|-------------------|------------|------------|------------|------------|------------|------------|------------|------------|------------|------------|
|                   | PBS        | MVs        | PBS        | MVs        | PBS        | MVs        | PBS        | MVs        | PBS        | MVs        |
| <i>zgc:158463</i> | 15,6 ± 0,9 | 15,6 ± 0,4 | 16,2 ± 0,6 | 15,7 ± 0,3 | 15,6 ± 0,2 | 16,6 ± 1,8 | 15,6 ± 1,3 | 16,6 ± 0,7 | 15,4 ± 0,5 | 14,8 ± 0,8 |
| <i>ifnphi1</i>    | 25,4 ± 0,5 | 26,4 ± 0,9 | 27,7 ± 1   | 26,6 ± 0,8 | 26 ± 0,7   | 24,8 ± 0,1 | 25,4 ± 0,5 | 26,1 ± 0,3 | 24,6 ± 0,4 | 24,3 ± 0,5 |
| <i>ifnphi2</i>    | 31,7 ± 0,5 | 32,5 ± 0,9 | 31,7 ± 0,4 | 31,7 ± 0,2 | 32,4 ± 0,6 | 30,4 ± 0,7 | 31,7 ± 0,5 | 30,9 ± 0,4 | 29 ± 0,8   | 29,2 ± 0,5 |
| <i>ifnphi3(1)</i> | 31,6 ± 0,4 | 33,9 ± 0,8 | 33,7 ± 0,7 | 33,2 ± 1,1 | 33,4 ± 0,6 | 31,1 ± 0,5 | 31,6 ± 0,4 | 30,8 ± 0,7 | 29,6 ± 0,9 | 29,6 ± 0,8 |
| <i>ifnphi3(2)</i> | 31,6 ± 0,4 | 32,1 ± 0,4 | 34 ± 0,2   | 33,2 ± 0,6 | 33,1 ± 0,1 | 30,6 ± 0,1 | 31,6 ± 0,4 | 31,5 ± 0,9 | 29,3 ± 0,8 | 29 ± 0,9   |
| <i>mxα</i>        | 28,1 ± 0,9 | 26,8 ± 1,7 | 30,7 ± 0,5 | 29,4 ± 0,3 | 30,4 ± 0,7 | 28,8 ± 1,8 | 28,1 ± 1,3 | 28,6 ± 1,8 | 26,8 ± 0,3 | 24,8 ± 1,7 |
| <i>tnfa</i>       | 22,6 ± 0,7 | 24,9 ± 0,3 | 22,8 ± 0,6 | 23,2 ± 0,3 | 25,4 ± 0,1 | 24,2 ± 0,3 | 22,6 ± 0,7 | 24,4 ± 0,3 | 22,6 ± 0,5 | 22,3 ± 0,5 |
| <i>tnfb</i>       | 37,5 ± 0,8 | 40,6 ± 2,4 | 25,4 ± 1   | 37,7 ± 1,2 | 41 ± 0,6   | 41 ± 0,7   | 37,5 ± 1,3 | 40 ± 0,7   | 37,5 ± 0,9 | 36,4 ± 1,8 |
| <i>ifnγ1-1</i>    | 28,7 ± 0,7 | 24,5 ± 1,3 | 30,4 ± 0,9 | 31,4 ± 0,6 | 34,7 ± 0,7 | 29,4 ± 2,4 | 28,7 ± 1,4 | 32,1 ± 1   | 28,7 ± 0,9 | 29,5 ± 0,7 |
| <i>ifnγ1-2</i>    | 23 ± 0,7   | 24,2 ± 0,8 | 24,1 ± 0,5 | 24,8 ± 1   | 27,6 ± 0,8 | 24,1 ± 0,4 | 23 ± 0,7   | 24,9 ± 0,8 | 23 ± 0,5   | 23 ± 0,6   |
| <i>il12α</i>      | 32,2 ± 0,2 | 29,7 ± 0,5 | 32,2 ± 0,7 | 32,5 ± 0,1 | 31 ± 0,2   | 31,8 ± 0,1 | 32,2 ± 0,2 | 31,6 ± 0,2 | 30 ± 0,2   | 30,3 ± 0,4 |
| <i>il1β</i>       | 26,6 ± 0,9 | 23,3 ± 0,9 | 26,3 ± 0,6 | 24 ± 0,6   | 27,7 ± 0,5 | 25 ± 0,2   | 26,6 ± 0,9 | 23,9 ± 0,6 | 23,1 ± 0,6 | 22,3 ± 0,3 |
